# Supplementary figures and images for: ARL3 mediates BBSome ciliary turnover by promoting its outward movement across the transition zone
Source: PubMed Central journal article supplement — J Cell Biol. 2022 Sep 21;221(10):e202111076. doi: 10.1083/jcb.202111076 (PMC9499826; doi:10.1083/jcb.202111076), 2022-09-21

# Figure 1

## A

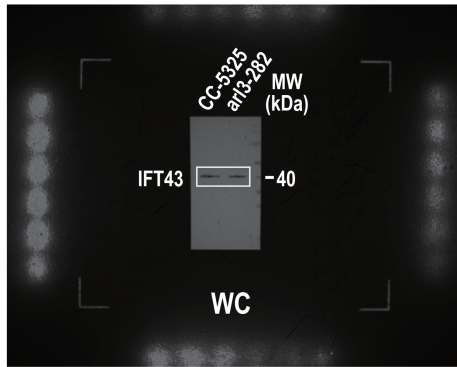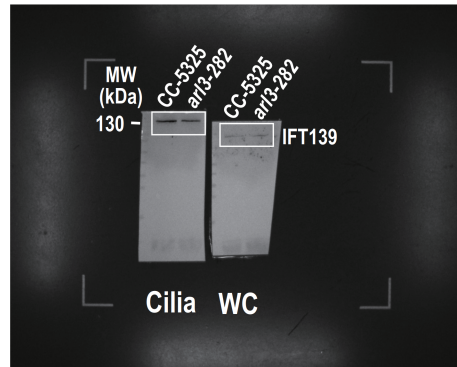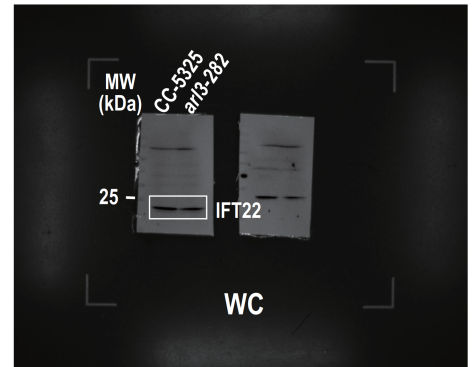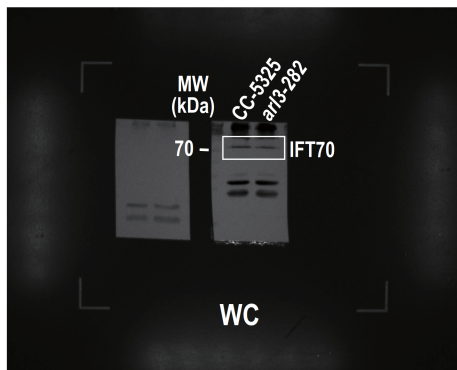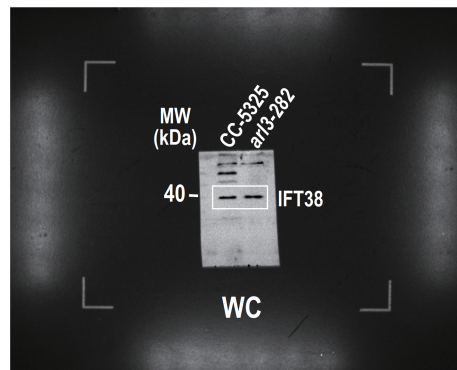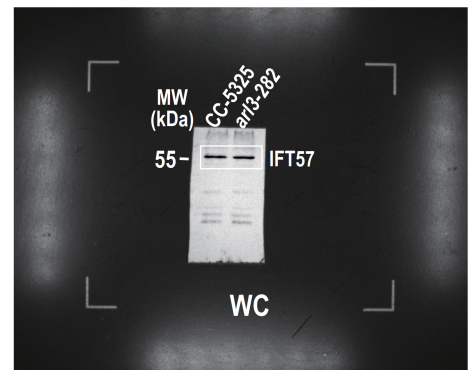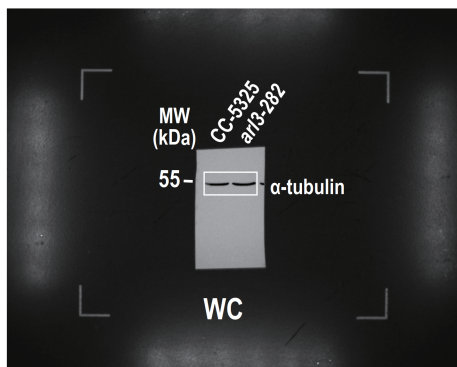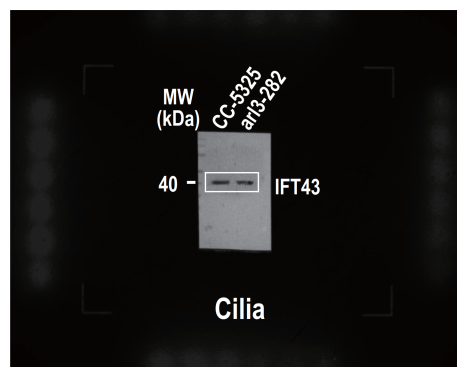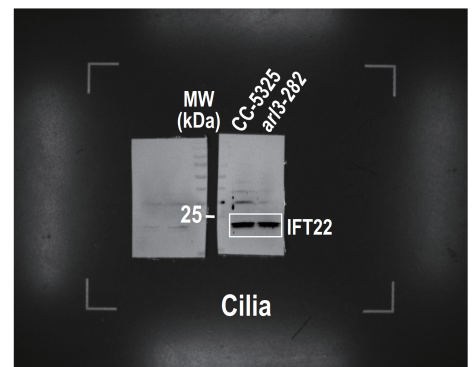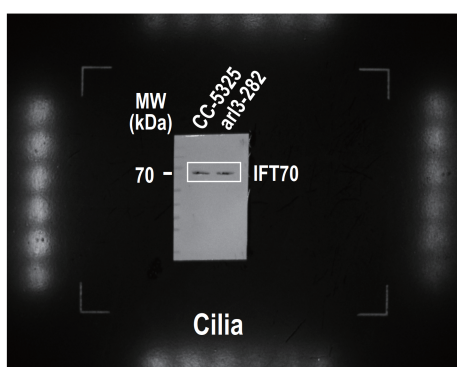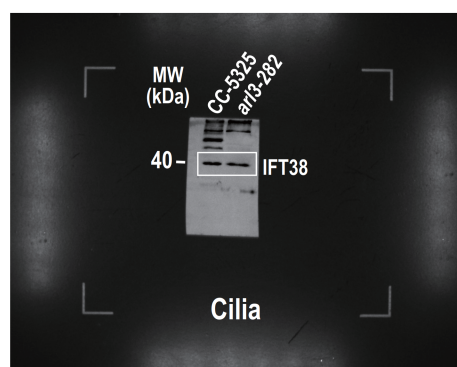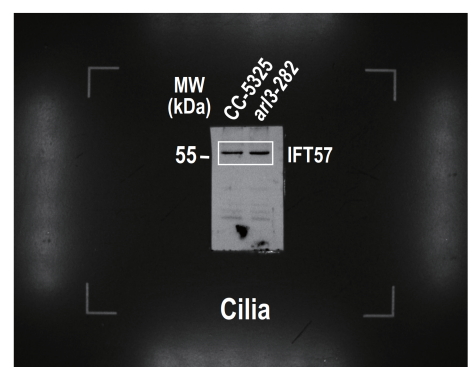

# Figure 1 (Cont')

## A (Cont')

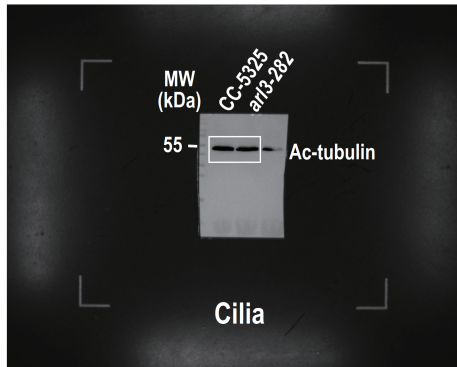

## B

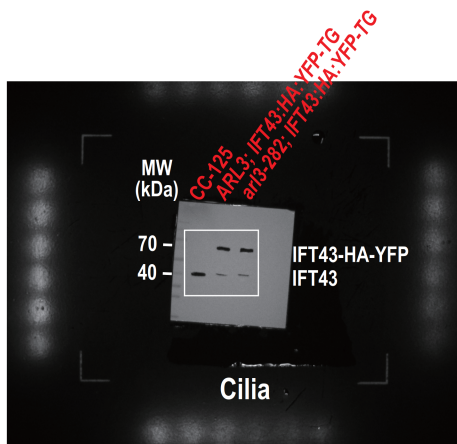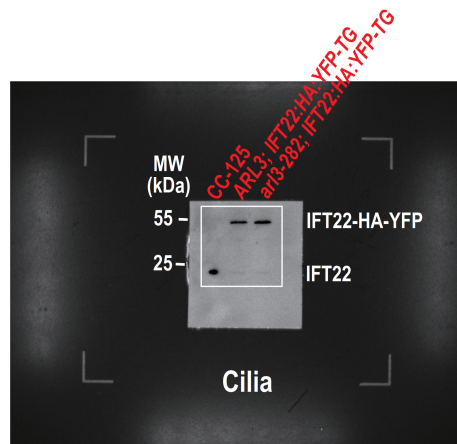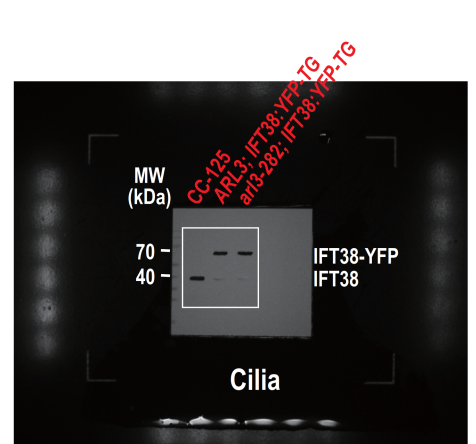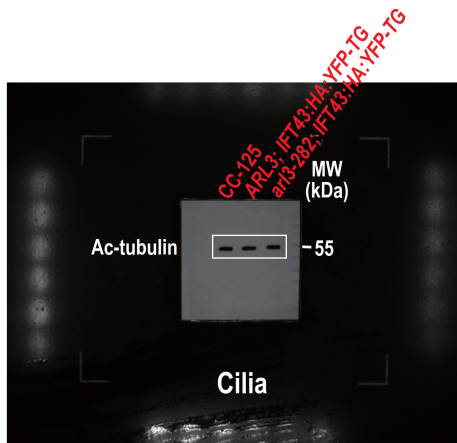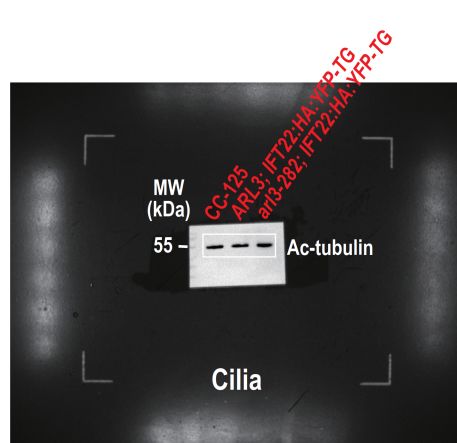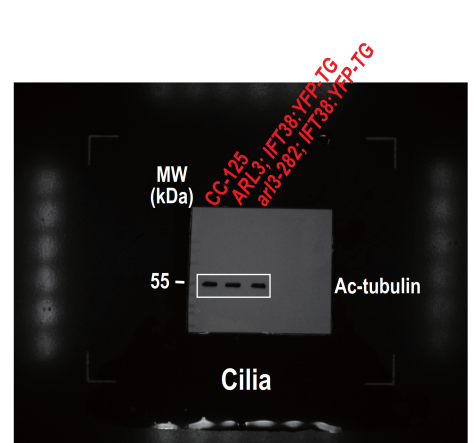

## E

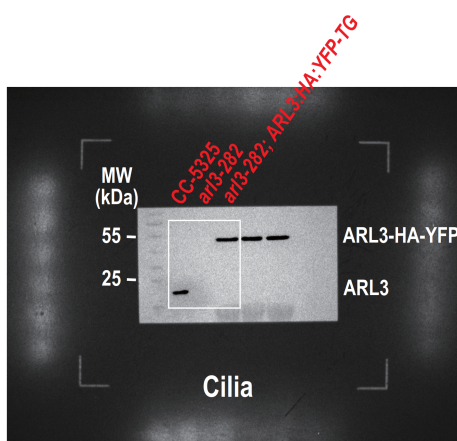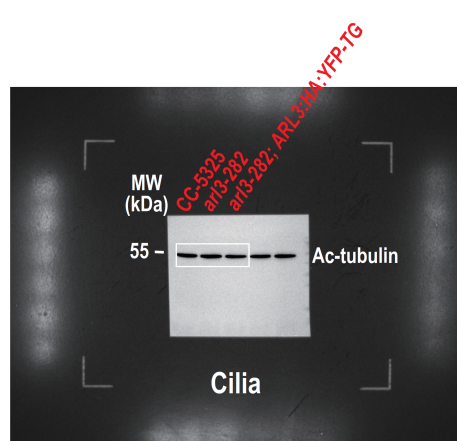

Supplement: JCB_202111076_SourceDataF1.pdf [file JCB_202111076_SourceDataF1.pdf]

Figure 5

A

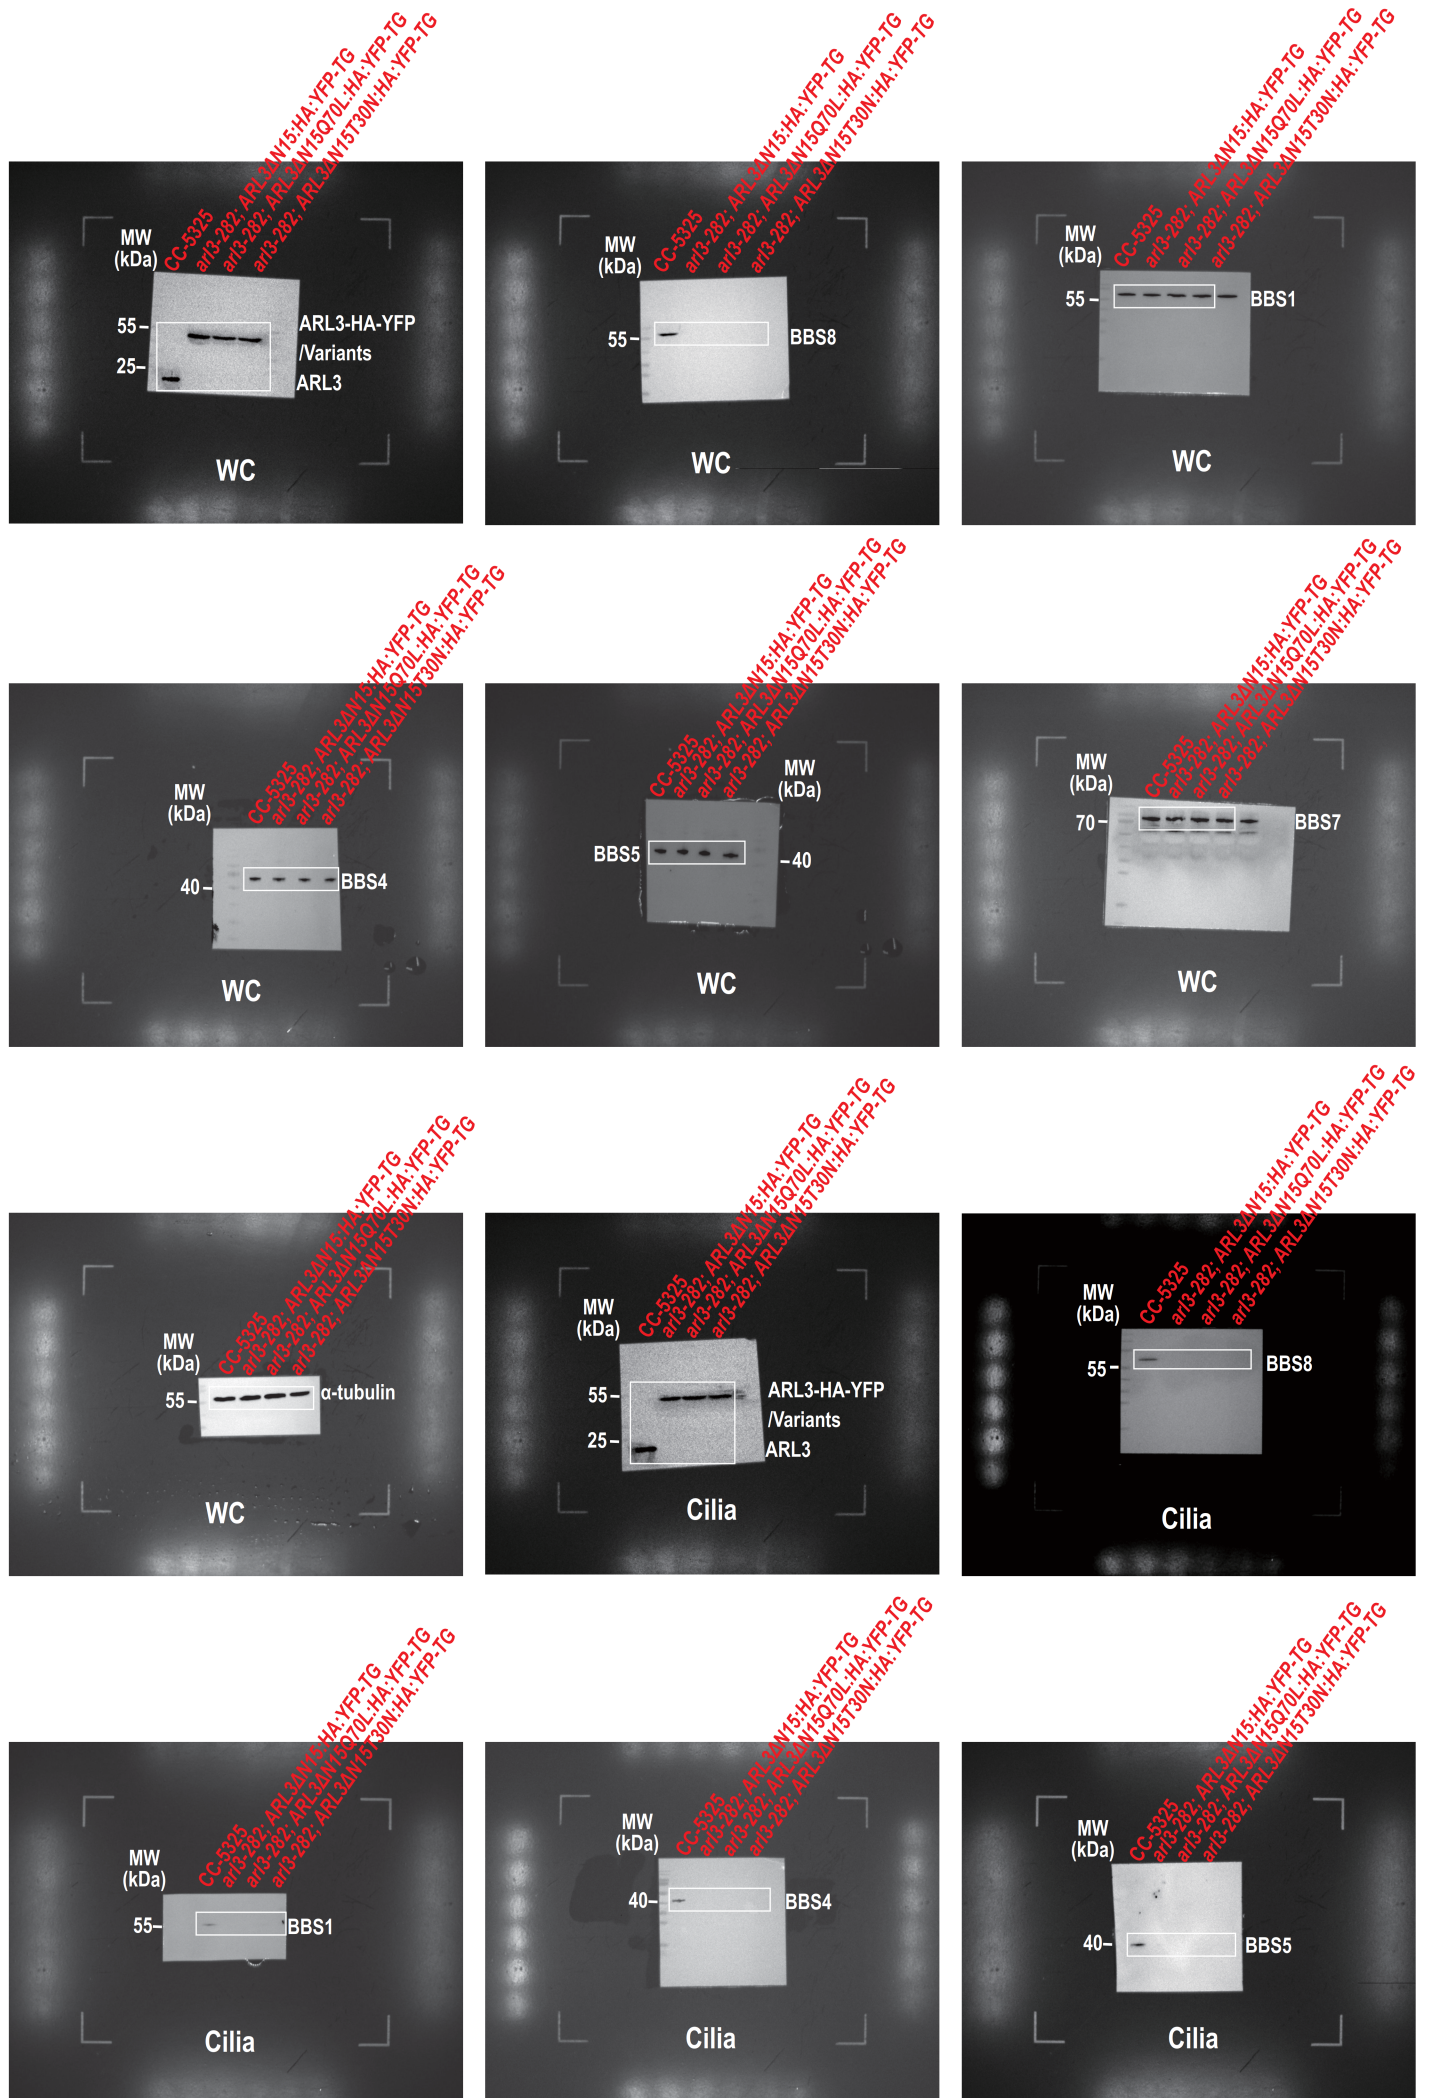



# Figure 5 (Cont')

## A (Cont')

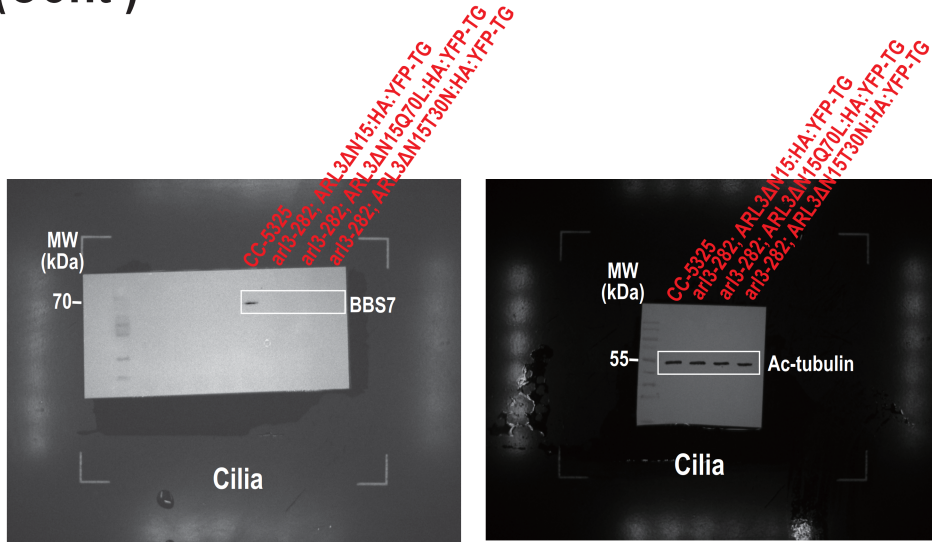

## C

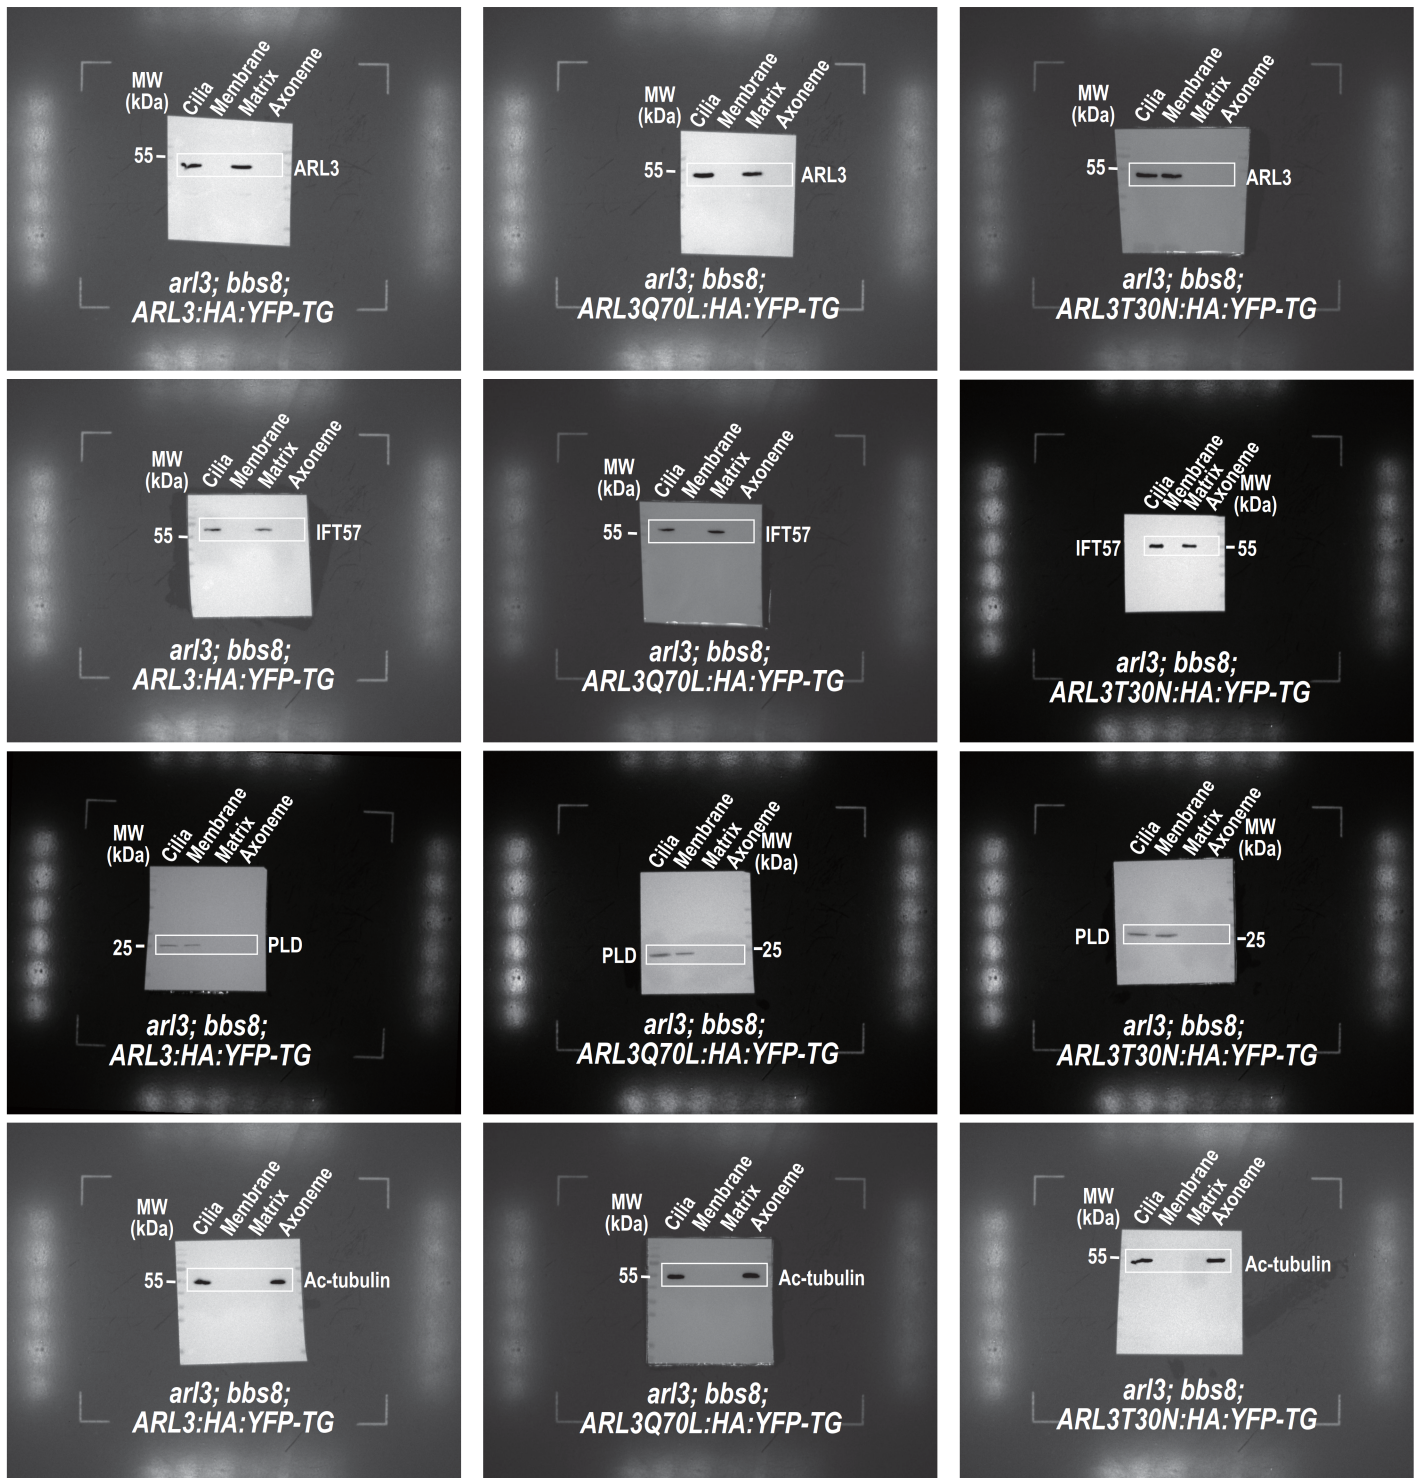

Supplement: JCB_202111076_SourceDataF5.pdf [file JCB_202111076_SourceDataF5.pdf]

Figure 6

A

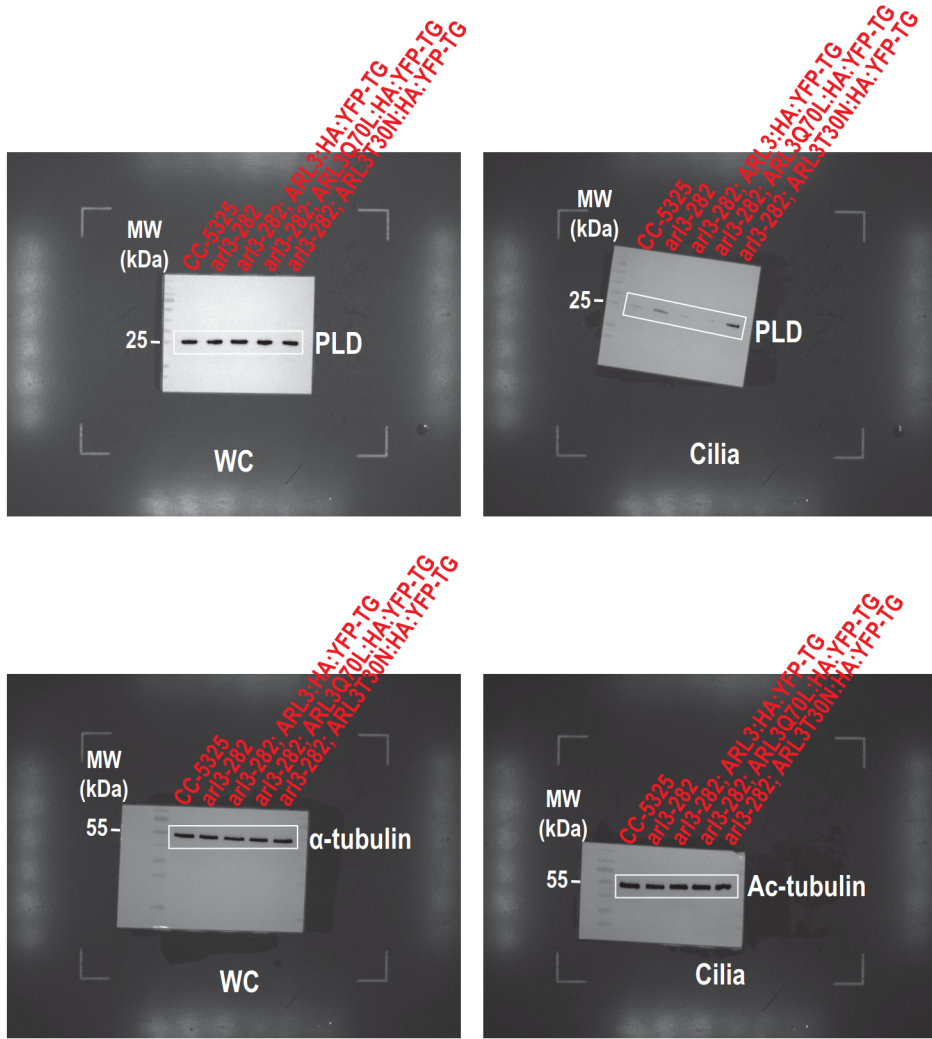

Figure 6

C

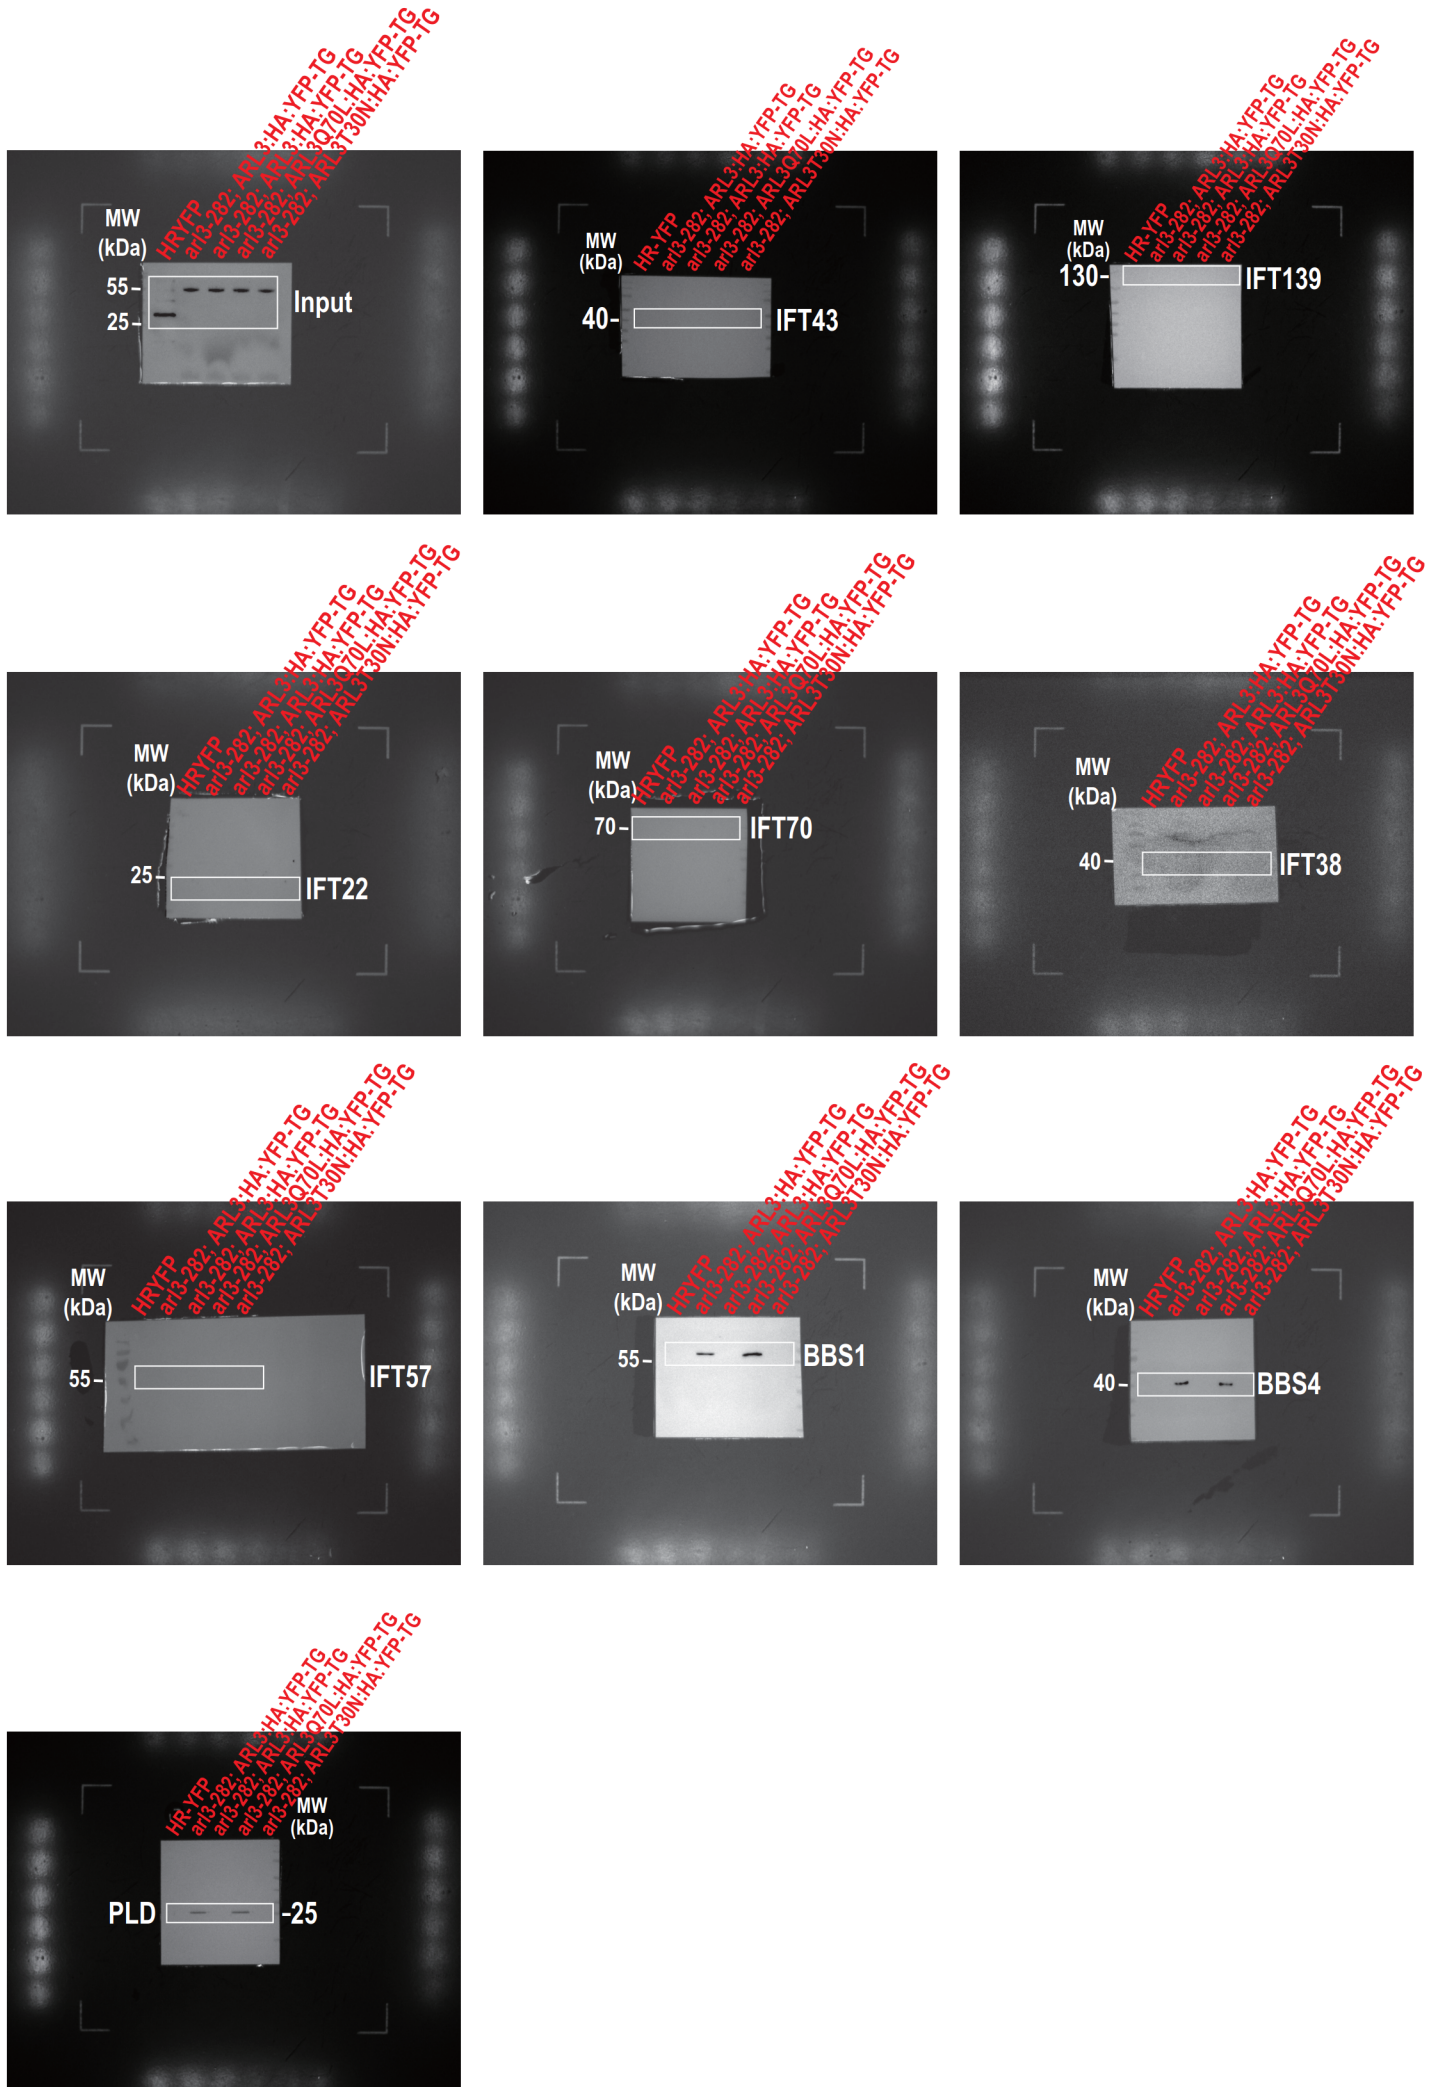

Supplement: JCB_202111076_SourceDataF6.pdf [file JCB_202111076_SourceDataF6.pdf]

# Supplementary figure 2

## A

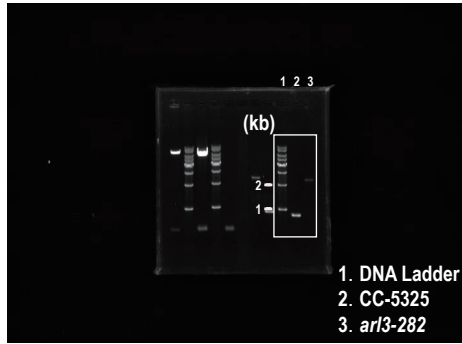

Supplement: JCB_202111076_SourceDataFS2.pdf [file JCB_202111076_SourceDataFS2.pdf]

# Supplementary Figure 5

## C

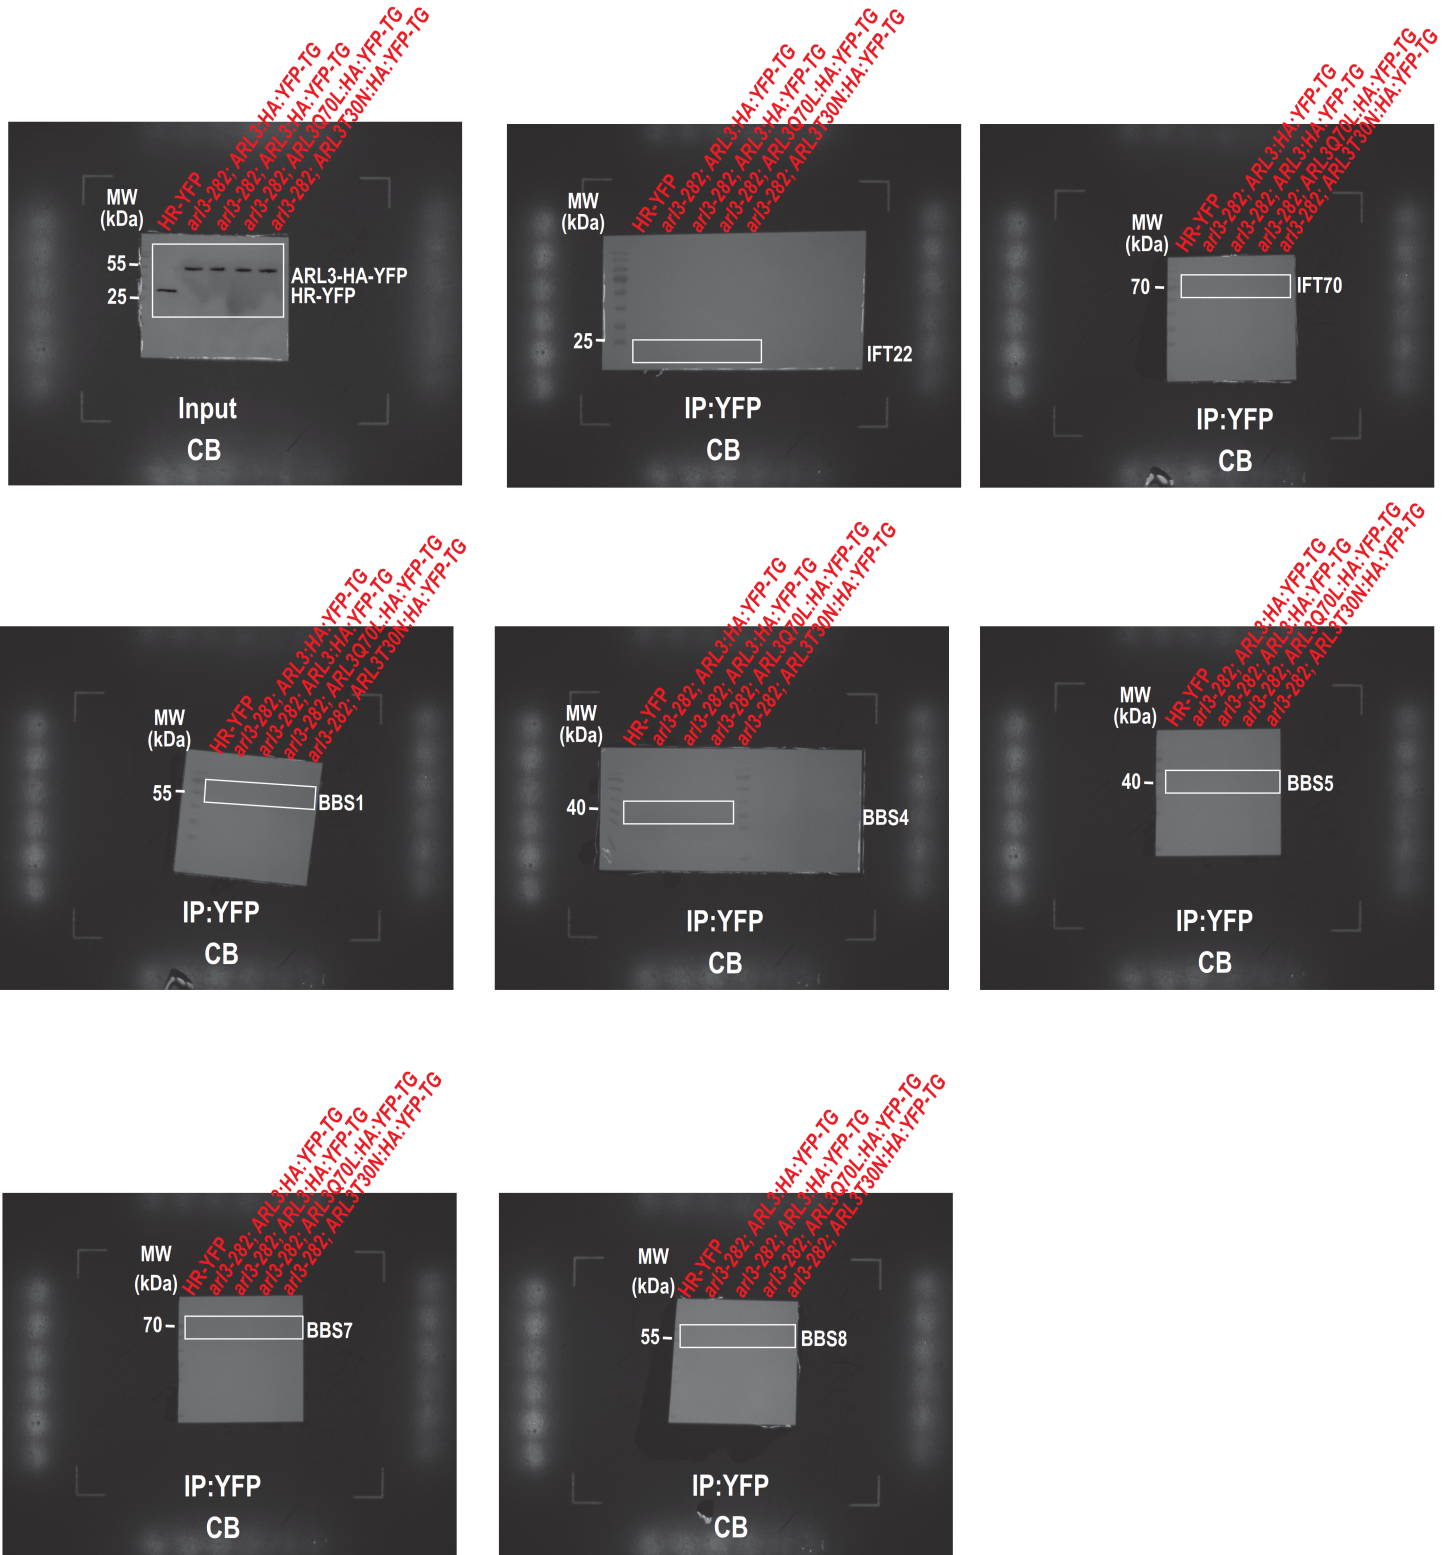

# Supplementary Figure 5 (Cont')

## C (Cont')

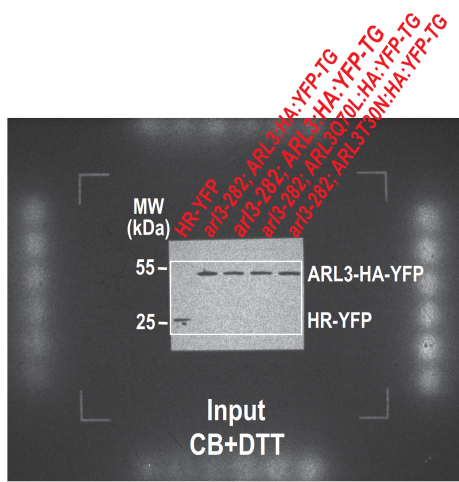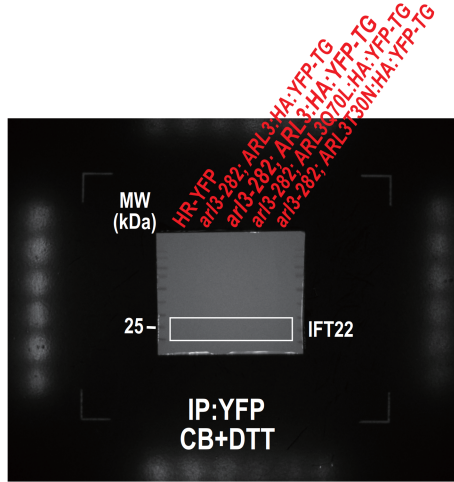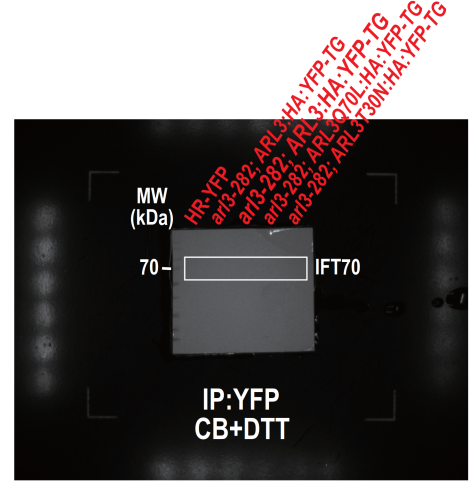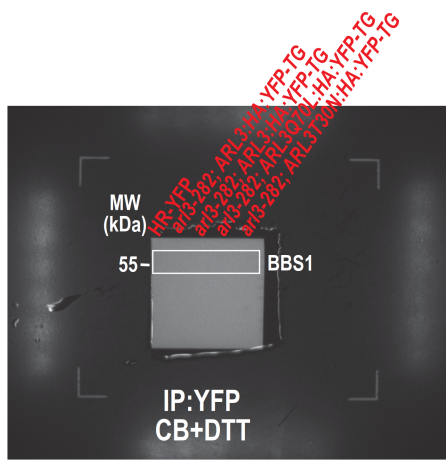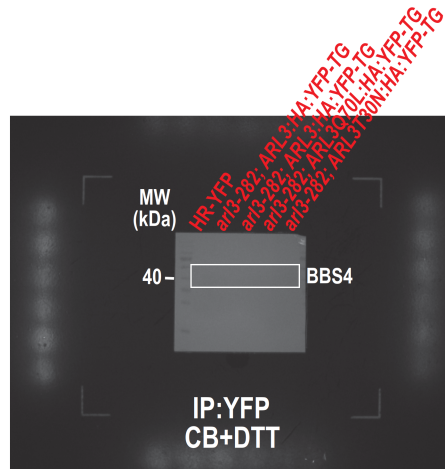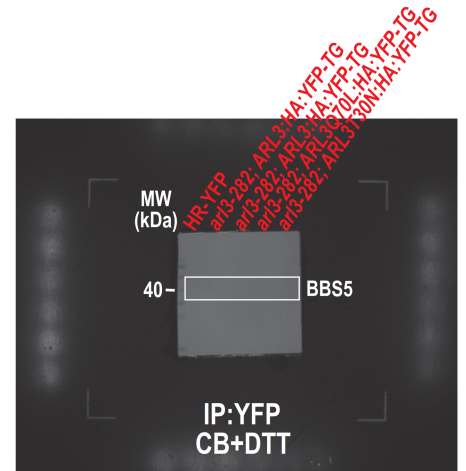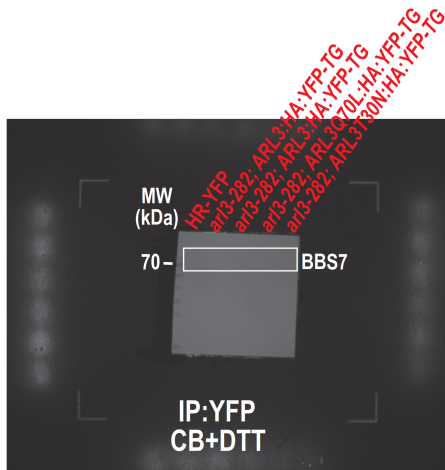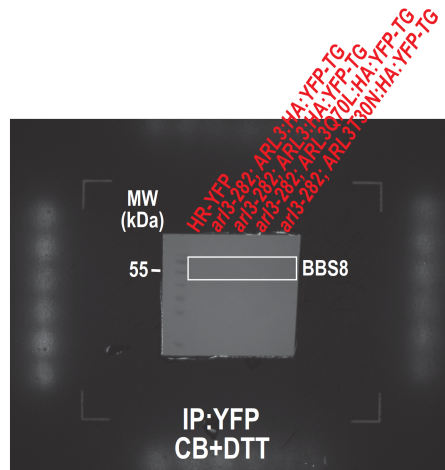

Supplement: JCB_202111076_SourceDataFS5.pdf [file JCB_202111076_SourceDataFS5.pdf]
